# A synthetic tubular molecular transport system

Pierre Stömmers<sup>1</sup>, Henrik Kiefer<sup>2</sup>, Enzo Kopperger<sup>3</sup>, Maximilian N. Honemann<sup>1</sup>, Massimo Kube<sup>1</sup>, Friedrich C. Simmel<sup>3</sup>, Roland R. Netz<sup>2</sup>, Hendrik Dietz<sup>1</sup>

<sup>1</sup>Lehrstuhl für Biomolekulare Nanotechnologie, Physik Department, Technische Universität München, Garching near Munich, Germany

<sup>2</sup>Fachbereich Physik, Freie Universität Berlin, Berlin, Germany

<sup>3</sup>Lehrstuhl für Physik Synthetischer Biosysteme, Physik Department, Technische Universität München, Garching near Munich, Germany

correspondence to [dietz@tum.de](mailto:dietz@tum.de)

## 1 **Abstract**

2 We report the bottom-up construction of a macromolecular transport system in which molecular pistons  
3 diffusively move through micrometer-long, hollow filaments. The pistons can cover micrometer distances in  
4 fractions of seconds. We built the system using multi-layer DNA origami and analyzed the structures of the  
5 components using transmission electron microscopy. We studied the motion of the pistons along the tubes  
6 using single-molecule fluorescence microscopy and performed Langevin simulations to reveal details of the  
7 free energy surface that directs the motions of the pistons. The tubular transport system achieves diffusivities  
8 and displacement ranges known so far only from natural molecular motors and realizes mobility  
9 improvements over five orders of magnitude compared to previous artificial random walker designs. Electric  
10 fields can also be employed to actively pull the pistons along the filaments, thereby realizing a nanoscale  
11 electric rail system. Our system presents a platform for artificial motors that move autonomously driven by  
12 chemical fuels and for performing nanotribology studies, and it could form a basis for future molecular  
13 transportation networks.

14

15

## 16 Introduction

17 Transporting matter along one-dimensional tracks instead of arbitrary trajectories offers efficiency  
18 advantages. This notion holds true on the macroscale and also for molecular scale transport in liquid solution.  
19 Eukaryotic cells have evolved a sophisticated cellular transportation system in which motor proteins move  
20 with micrometer long travel ranges and  $\mu\text{m/s}$  displacement speeds along a variety of cellular filaments (1-4).  
21 Creating similarly efficient artificial means of transporting molecules is an unmet challenge for nanoscale  
22 science and technology. There are several fundamental aspects that can guide the design of suitable tracks  
23 and means to attach particles to them so that the translational degree of freedom along the tracks is retained.  
24 For example, the structure of molecular tracks defines the free energy landscape that directs the diffusive  
25 motion of attached particles. The barriers in this landscape control the mobility in a Boltzmann-weighted  
26 fashion, where energetic barriers larger than a few units of thermal energy ( $k_{\text{B}}T$ ) can no longer be easily  
27 overcome by thermal fluctuations and thus represent roadblocks. Furthermore, due to Brownian motion in  
28 liquid solution, a particle moving on a molecular track must be tightly attached to it at all times or it will  
29 diffuse away. Natural sliding-clamp proteins (5) are mechanically interlocked with their tracks in a ring-on-  
30 axle fashion (Fig 1A left), while natural molecular motors such as kinesin or myosin typically walk “on” their  
31 filamentous track, thereby realizing a form of multivalent attachment with alternating bond formation (Fig.  
32 1A right). In principle, mechanical interlocking of a ring-like object on an axle should provide the highest  
33 mobility, because displacements of the ring do not necessarily require the breaking and reforming of  
34 molecular bonds. In the case of a molecular walker, by contrast, molecular bonds need to break and re-form  
35 repeatedly. Therefore, there will be a trade-off between particle mobility and the risk of losing the particle to  
36 solution. There are also biological examples of molecular transport inside tubes (6-9). For instance, bacterial  
37 secretion systems involve long protein channels through which molecular transport is driven by ATP-  
38 consuming motors (typically AAA+ ATPases). In the case of Type IV secretion systems (T<sub>4</sub>SS) involved in  
39 bacterial conjugation (6), DNA and proteins are transported from one bacterial cell through a long pilus to  
40 another cell. Transport inside hollow tubes has several beneficial properties: transport is insulated from the  
41 environment which allows rapid movements in the absence of exterior disturbances (as exemplified in  
42 subways and highspeed trains also on the macroscale) and the particles moving through the tubes cannot  
43 diffuse away.

44 Here, we used programmable self-assembly with DNA to create an artificial molecular transport system that  
45 reproduces several of the attractive properties of natural molecular-scale transporters, including multiple-  
46 micrometer-long travel ranges and  $\mu\text{m/s}$  displacement speeds. DNA nanotechnology has been previously  
47 employed to construct a variety of artificial molecular devices and machines (10-12). 3D DNA components  
48 have been designed and put together to create pivots, hinges, crank sliders, and rotors (13-15), in which DNA  
49 strand linkages or particular design features, such as mechanically interlocked but not directly connected  
50 parts constrain the range of movements of these devices. The utilization of strand displacement reactions  
51 (SDR) (10, 13, 15, 16) has been pivotal in allowing DNA nanoengineers to dynamically reconfigure DNA  
52 nanostructures. SDR-based DNA walkers have been created that can move on various types of linear tracks or

53 2D surfaces (17-20). Natural enzymes such as polymerases and nucleases have also been coupled to SDR-  
54 based walkers to bias their movements (21, 22). Because displacements of SDR walkers require breaking and  
55 reforming double-helical domains formed between walker and track, the speed of SDR walkers is coupled to  
56 the kinetics of these reactions, which can limit overall performance. Li et al addressed this challenge recently  
57 with a sequence-optimized cartwheeling DNA object capable of undergoing undirected diffusive motions on a  
58 two-dimensional DNA carpet with the hitherto fastest reported diffusive mobilities of DNA objects up to 17  
59 nm<sup>2</sup>/s (23). These diffusivities are still many orders of magnitudes lower than those reported for natural motor  
60 proteins, which may be attributed to limitations arising from the kinetics of DNA strand hybridization and  
61 dissociation.

## 62 **Results**

63 To overcome the motility limitations in previously reported random walker designs, we decided to use  
64 inverted mechanical interlocking to realize our molecular transport system: instead of a ring-on-an-axle, our  
65 mobile unit takes the form of a “piston” that can freely move along a hollow tube-like filament (Fig. 1B). To  
66 build this system, we load the piston into a subunit of the tube called “barrel”, extend the barrel on both sides  
67 by polymerization into a long tube using empty barrels, followed by capping of the terminal openings of the  
68 tube to prevent the mobile unit later from exiting the track, and finally we release the piston from its docking  
69 site in the tube. To facilitate loading the piston into the barrel, we first load the piston into an opened-up  
70 conformation of the barrel, followed by closing this object.

71 We used multi-layer DNA origami (24) and docking schemes (25) to build and attach to each other the  
72 components of our system (Fig. 2). The piston, barrel and the two capping units (Fig. S1-7) are each comprised  
73 of 10, 82 and 96 helices, respectively, arranged in honeycomb patterns. The piston has a simple rod-like shape  
74 and is folded from a 1033 bases-long custom-sequence scaffold strand (26). It is ~40 nm long and has a cross  
75 section of ~8 by 12 nm. The barrel has a hexagonal shape and is folded from two 7560 bases-long orthogonal-  
76 sequence scaffold strands (26) in a one-pot folding reaction. We also created a hinge mechanism that divides  
77 the barrel into two half tubes, connected by flexible single-stranded parts. The barrel is ~64 nm long and has  
78 an inner tube and outer tube diameter of ~15 and ~30 nm, respectively. The piston is therefore only slightly  
79 thinner than the central bore of the barrel. Based on this design, we expect that the motion of the piston will  
80 be effectively constrained to two degrees of freedom: translation along the barrel axis and rotation around  
81 the long axis of the piston. The two caps are each folded from 7560 bases long scaffold strands. They have  
82 arrowhead-like shapes and are 32 and 42 nm long, respectively, with a diameter of ~30 nm. We validated the  
83 successful assembly of all components by direct imaging with negative-staining TEM (Fig. 2) and by gel-  
84 electrophoretic mobility analysis (EMA) (Fig. S8)

85 The first construction step entailed loading the piston monomer into the opened-up barrel monomer.  
86 Notably, the piston-barrel interaction must endure through subsequent steps such as barrel-closure and track  
87 polymerization, but it must also be fully reversible to allow for releasing the piston from the docking site  
88 inside the extended tunnel. To satisfy these criteria, we tested several piston variants (Fig. S9) and different

89 docking strategies (Fig. S10) while iterating through the cycle of piston-loading, track assembly, and release  
90 in extended tracks. To dock the piston to the barrel, we created a protrusion on the piston variants which are  
91 shape-complementary to a recess located in the interior surface of the barrel (Fig. 2C). We used strand  
92 hybridization of single-stranded overhangs and scaffold loops to link the edges of the protrusion of the piston  
93 to those of the recess in the barrel (Fig. 2C, S11 design). Piston-barrel assembly was validated by EMA and by  
94 negative-staining TEM (Fig. 2C, right). The second construction step is to close up the barrel (Fig. 2D). To this  
95 end the two half tubes feature a second set of shape-complementary protrusions and recesses on the tube  
96 edges. The interfaces of these features are comprised of single-stranded scaffold loops. Upon addition of  
97 sequence-complementary oligonucleotides, the barrel is then permanently closed by strand hybridization  
98 bridging protrusion and recess interfaces, which we validated by EMA and negative-staining TEM (Fig. 2D,  
99 S12, S13).

100 The third step entailed polymerizing the piston-loaded barrel (Fig. 2D) with empty barrel monomers (Fig. 2E)  
101 to build long tracks (Fig. 3A). To this end we tested a panel of helical interface interaction designs and a  
102 variety of reaction protocols. We eliminated variants that gave only short multimers, yielded branched  
103 filament networks instead of single filaments, and had the tendency to polymerize not only in the designed  
104 head-to-tail but also in head-to-head or tail-to-tail configurations, thereby causing a constriction in the  
105 central bore that can block the mobile unit from diffusing along the track (Fig. S14). In the final design  
106 solution, our track polymerization was performed by stepwise addition of two sets of oligonucleotides: (1)  
107 sequence complementary to scaffold loops at the helical interface of only one of six hexagonal facets of the  
108 barrel, (2) sequence complementary to the barrel scaffold loops of the remaining five facets of the barrel (Fig.  
109 S15). In the fourth assembly step, we sealed the terminal openings of the tunnels by adding the capping  
110 building blocks. The caps are attached via single stranded overhangs at the cap ends that hybridize to the  
111 helical interfaces at the ends of filaments. EMA and negative-staining TEM confirmed that the capping  
112 reactions worked as desired (Fig. 3A, Fig. S16, S17, S18).

113 As a result, we obtained capped, piston-containing, multiple-micrometer-long filaments that appeared  
114 mostly straight with few kinks and without other obvious defects as seen by negative-staining TEM (Fig. 3B,  
115 C, Fig. S19). The caps can be discerned in the TEM images (Fig. 3B, insets). We labeled the barrel and piston  
116 monomers with cyanine-5 and cyanine-3 fluorophores (Fig. S20, S21), respectively, to allow imaging by  
117 fluorescence microscopy. We also labeled the barrels with biotin moieties along a six-helix-bundle shaped  
118 bulge running along the tunnel to immobilize the filaments on neutravidin-coated surfaces (Fig. S22). The  
119 fluorescence-microscopy images that we acquired from these samples (Fig. 3C, Supplementary movie 1) are  
120 reminiscent of images known from motility assays with natural motor proteins and their filaments (4).

121 The last step in the construction of our molecular transport system is releasing the piston from its docking site  
122 in the central bore of a fully assembled and capped track. During the early iterations of designing our system,  
123 the piston monomer had very low mobility for multiple reasons, so it was difficult to judge whether the  
124 release was successful by single particle tracking in real time. We therefore resorted to monitoring efflux of  
125 pistons from barrels and tracks with EMA, negative-staining TEM and fluorescence microscopy. That is, we

126 acquired images from piston-loaded but uncapped tracks prior and after subjecting the samples for several  
127 hours or days to putative piston-releasing conditions (Fig. S23) Using this strategy, we identified procedures  
128 that successfully caused piston release in situ, even though the actual diffusive mobility was too low to be  
129 seen in real-time at that point. In our final design solution, we released the piston from its docking site inside  
130 the capped tracks by adding invader strands from the outside. The invader strands permeate through the  
131 interhelical cavities in the filament walls and release the piston by toehold mediated strand displacement (Fig.  
132 S24).

133 With thus prepared samples, we observed many filaments with piston units performing random diffusive  
134 motions along the tracks they were constrained on (Fig. 3D, supplementary movie 1, Fig. S25-S36). The  
135 number of mobile units per track can be controlled via the initial stoichiometry of piston-loaded barrels to  
136 barrels for polymerizing multimers. Hence, situations can be created where multiple pistons move on the  
137 same track, leading to situations where they apparently bump into each other, move together for a while, and  
138 then part ways (Supplementary movies 2, 3).

139 We quantitatively analyzed the motions of the mobile units on their tracks using super-resolution centroid  
140 tracking (27), which yielded position over time trajectories (Fig. 4A, B, Fig. S25-S36). The pistons featured  
141 multiple fluorophores, which enabled continuous particle tracking typically over time spans around ~ 10  
142 minutes before the signal got too dim because of dye bleaching.

143 We observed diffusive motions of single pistons along the entire length of the underlying filaments. The  
144 farthest motions we recorded occurred over a total length of 3  $\mu\text{m}$  (Fig. 4A, supplementary movie 4). There  
145 was heterogeneity with respect to the diffusive mobility of the particles. Some particles would get stuck  
146 repeatedly at conserved sites (e.g., Fig. 4A) which we attribute to localized roadblocks in the tracks. Such  
147 defects could be caused by single-stranded sites or slightly angled connections between barrel monomers,  
148 which would require an energetically unfavorable bending deformation of the piston in order to move  
149 through such a constriction.

150 Other particles did show very high mobility, moving over micrometer distances within fractions of seconds  
151 without getting stuck (Fig. 4B, supplementary movie 5). We used the single-particle position-time traces to  
152 compute the probability density for populating particular filament positions, and from those by Boltzmann-  
153 inversion the free-energy profiles of the tracks (Fig. 4C). The free-energy profiles illustrate the local minima  
154 and barriers at which particles appeared to get trapped repeatedly. For example, the highly mobile particle  
155 from Fig. 4B was confronted with few barriers, with the highest one only  $\sim 3 k_B T$  high. By contrast, the particle  
156 from Fig. 4A which repeatedly remained stuck had more roadblocks in its way, with barriers up to  $5 k_B T$  high.

157 To see whether external forces can drive the motion of the piston and potentially accelerate the overcoming  
158 of roadblocks, we also tracked the motion of particles in the presence of applied electric fields. Two  
159 electrodes in a previously described setup (28) were used to generate an electric field, whose direction was  
160 inverted every 5 seconds (Fig. 4D). We observed that particles in tracks that were oriented in parallel to the  
161 field rapidly moved in response to the field (Fig. S37, supplementary movies 6, 7). This means that when the

162 field switched, the pistons moved quickly from one extreme of the underlying filament to the other and then  
163 remained stuck there until the field was switched into the opposite direction. When the field was switched off,  
164 the pistons showed diffusion-with-traps type behavior. These findings suggests that the trapping is caused by  
165 permanent features of the track and cannot be cleared simply by pulling the piston by force along the entire  
166 track. For pistons in tracks that were oriented perpendicularly to the field, as expected, the field had little to  
167 no effect on the motion (Fig. S38).

168 To quantify the effective (free) diffusive mobility, we computed the mean-square displacement (MSD) over  
169 time from the single particle position time traces (Fig. 5A-C). The MSD traces are first linear in time as  
170 expected for normal diffusion but then they saturate. The saturation reflects that the diffusion occurs in  
171 tracks with finite size. For our system, the confinement length corresponds to the entire filament length, i.e.,  
172 to the distance between major roadblocks. From analyzing many particles, we find that the majority of  
173 particles has diffusivities up to  $0.1 \mu\text{m}^2/\text{s}$ , but the fastest recorded particles that had little to no visible  
174 roadblocks moved with up to  $0.3 \mu\text{m}^2/\text{s}$  (Fig. 5B). The diffusive mobility increased significantly with increasing  
175 ambient temperature, as seen by comparing the MSD from single particles recorded at  $20^\circ$ ,  $25^\circ$ ,  $30^\circ$ , and  $35^\circ\text{C}$   
176 (Fig. 5C). The diffusivity approximately doubled when going from  $20^\circ\text{C}$  to  $35^\circ\text{C}$ .

177 We computed the spatial autocorrelation of the probability density to populate track positions from each  
178 recorded particle, to investigate for hidden periodicities. The spatial autocorrelation function (Fig. 5D),  
179 averaged over many single-particle recordings, reveals clear periodic peaks occurring in intervals of 64 nm,  
180 which matches the length of a single barrel subunit. The periodicity can also be seen in the spatial  
181 autocorrelation from individual particles, albeit less clearly. The fact that the designed periodicity of the track  
182 is recovered from the motion of the particles suggests that the mobile units get momentarily trapped in  
183 periodically occurring structural features. This behavior could be caused for instance by the piston docking  
184 site (a small depression), which appears in every barrel monomer.

185 The hallmark of Brownian motion is a Gaussian velocity distribution. By contrast, the velocity distribution  
186 computed from the experimental random walker position-time traces deviates strongly from a Gaussian (Fig.  
187 5E). The non-Gaussian behavior of distributions that are averaged over individual particles does not  
188 necessarily mean that the motion of a single, freely diffusing particle follows a non-Gaussian process, but  
189 could alternatively stem from deviations among individual particles (29). In the present case, instead, we  
190 suspect that additional non-Gaussian effects come from the periodic potential landscape connected to the  
191 molecular structure of the barrel. To substantiate this further, we compare our experimental findings with  
192 Langevin simulations of a particle in a quasi-periodic potential (Fig. 5E, inset).

193 In the simulation model, the particle diffuses driven by random white noise that mimics the thermal  
194 stochastic environment. The particle velocity's standard deviation depends sensitively on the barrier height  
195 (see Suppl. Note 1). The analysis of the experimental traces suggests a significant variation of potential  
196 barriers (e.g., Fig. 4A vs 4B). Accordingly, we averaged simulated trajectories with potential barrier heights  
197 that vary in a range between 1 and  $10 k_B T$ . To match experimental conditions, we also added localization  
198 noise to the simulated trajectory positions. With a fixed period of  $a=64$  nm and a fixed potential well width of

199  $b=4$  nm, the velocity distribution obtained by averaging over many thus simulated single particle trajectories  
200 agrees favorably with the experimentally observed velocity distribution, which shows that the non-Gaussian  
201 behavior is due to the periodic potential landscapes with different barrier heights.

## 202 **Conclusions**

203 In this work we present a performant artificial macromolecular transport system that is based on an inverted  
204 mechanical interlocking concept: A mobile DNA building block moves through a micrometer-long tube with  
205 mobilities up to  $0.3 \mu\text{m}^2/\text{s}$ , with up to  $3 \mu\text{m}$  total displacements. Micrometer distances can be covered  
206 diffusively in fractions of seconds. Our artificial transport system therefore accomplishes an important  
207 mechanistic step forward: it achieves diffusivities and displacement ranges known from natural molecular  
208 motors. It realizes a mobility leap over five orders of magnitude compared to previous DNA random-walker  
209 designs (i.e.  $17 \text{ nm}^2/\text{s}$  (23)). It allows tracking motions in real-time using the very same techniques that  
210 researchers used to reveal the secrets of natural protein motors. As such it presents an excellent starting point  
211 to build and study artificial motors that move autonomously driven by chemical fuels.

212 The performance of our nanoscale tube system currently appears limited solely by residual stochastic defects  
213 in the track, whose occurrence can presumably be further reduced in future designs. A key ingredient in our  
214 design was protecting the mobile unit from the exterior. With this protection, our system can also enable  
215 systematic nanotribology and mobility studies, for example as a function of environmental parameters such  
216 as temperature as we discussed.

217 The chemical synthesis of small artificial molecular motors (AMM) including mechanically interlocked  
218 molecules such as rotaxanes and catenanes has greatly advanced the understanding of the requirements for  
219 building such objects, and how to drive directed molecular motions using chemical fuels, light, and other  
220 stimuli (30-36). Theoretical frameworks for directing random Brownian motion of molecules or their parts  
221 were primarily developed by analyzing natural motor proteins (37-42) and by using AMMs as model systems.  
222 Our DNA-based transport system could provide a structural framework in which the smaller AMMs generated  
223 by chemical synthesis could be embedded to couple the directed motion of AMM to walker movement.

224 Changes in environmental parameters such as pH, ionic strength or temperature have been previously used to  
225 induce conformational changes in DNA nanostructures, based on the sensitivity of certain DNA motifs to such  
226 parameters (25, 43-45). External fields and light have also been explored for generating motion in switch-like  
227 or rotary DNA nanostructures (28, 46-48). In the present work, driven by electric fields, we realized long-  
228 range linear motion of DNA building blocks along molecular tracks with high speeds up to  $9 \mu\text{m}/\text{s}$ .  
229 Controllable physical movement of matter along molecular tracks could be used to transport materials  
230 between compartments (7) and to mechanically gate the state of larger biochemical machines such as an  
231 artificial cell, by analogy to the flow of electrons in an electric circuit. Directional in-plane electric fields could  
232 be used to drive molecular cargo transporters through molecular tracks that are connected by DNA gates with  
233 physical valves in between that may be operated by e.g., out-of-plane electric fields or by using biochemical  
234 stimuli. Gopinath et al have described how to place DNA nanostructures on solid state surfaces in a

235 programmable fashion (49), and Schulman et al have shown how to connect distal landmarks on surfaces with  
236 DNA nanotubes (50). These procedures could potentially be combined with our transport system to build a  
237 molecular transportation network.

238 Next to the connection of distant reaction compartments, protected one-dimensional transport within a  
239 tubular track suggests a variety of other potential applications. For example, the “piston” could be used to pull  
240 other cargo into the tube. One possibility would be to pull in and stretch DNA molecules for barcoding  
241 analysis (similar as in silicon-nanofabricated channels). Aligning enzymes inside of the tube could be used to  
242 generate “assembly line”-like multi-enzyme cascades, in which the reactants (loaded on the piston) are  
243 protected from the environment by the tube and are subjected to enzymatic modifications in a strict order,  
244 dictated by the 1D geometry of the channel. To further insulate the system from chemical disturbances, it is  
245 also conceivable to coat the tubes for example with an impermeable lipid bilayer.

246

#### 247 **Acknowledgements**

248 This work was supported by a European Research Council Consolidator Grant to H.D. (GA no. 724261), the  
249 Deutsche Forschungsgemeinschaft through grants provided within the Gottfried-Wilhelm-Leibniz Program  
250 (to H.D.), the SFB863 Project ID 111166240 TPA9 (to H.D.) and TPA8 (to F.C.S.), and SFB1449 Project (to  
251 R.R.N). We thank Matthias Schickinger for support with the TIRF microscope and Martin Langecker for  
252 support with the setup used for electric-field driven transport.

#### 253 **Author contributions**

254 H.D. designed the research, P.S. performed research. H.K. performed simulations (Fig. 5). E.K., F.C.S.  
255 contributed instrumentation for electric-field driven transport in (Fig. 4). E.K supported research with electric-  
256 field driven motions (Fig. 4). M.H. provided scaffold strands. M.K. performed TEM analysis. R.R.N. supervised  
257 simulations. F.C.S. supervised electric-field driven transport experiments. All authors edited and commented  
258 on the manuscript.

259

260



## Figures & Captions

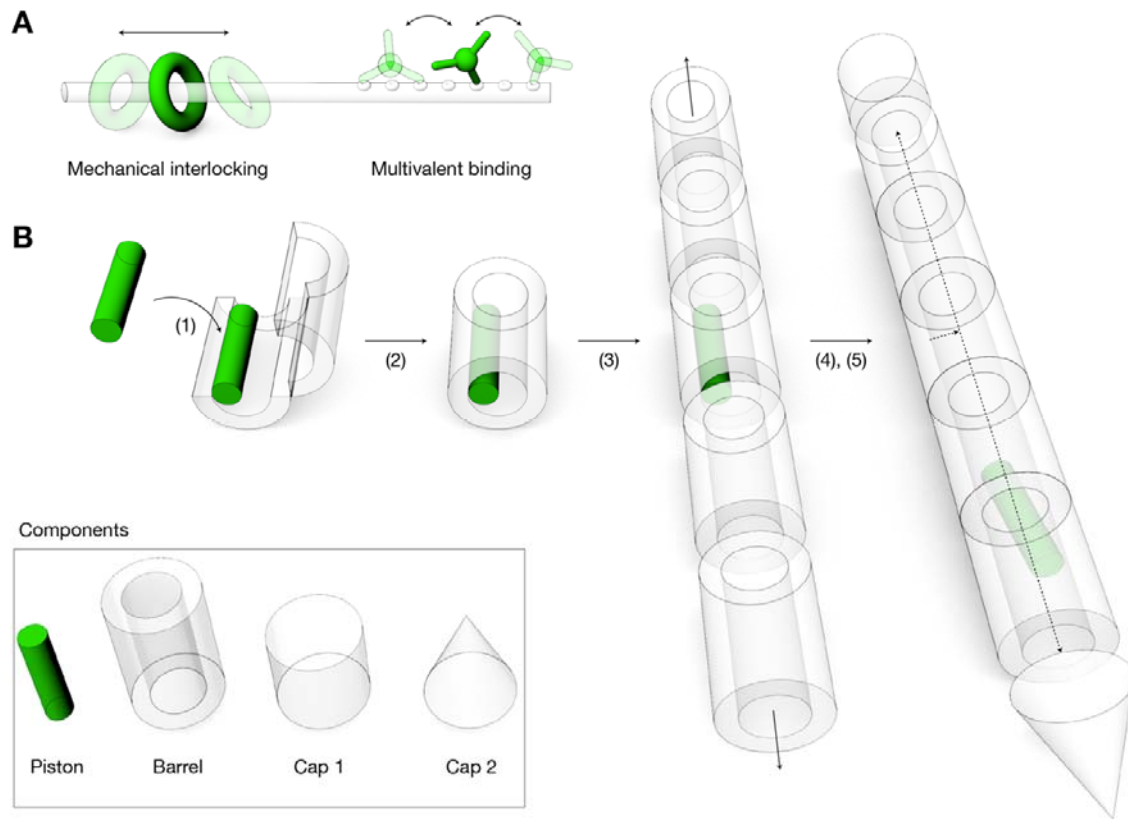

261 **Figure 1** | (A) Strategies for confining a mobile random walker onto a one-dimensional (1D) track. (B)  
262 Schematics of inverted mechanical interlocking and stepwise self-assembly of such a system. (1) loading the  
263 "piston" building block onto the barrel building block in open state, (2) closure of barrel, (3) polymerization of  
264 barrel building blocks into long filaments, (4) capping of filaments, (5) release of piston from docking site.  
265

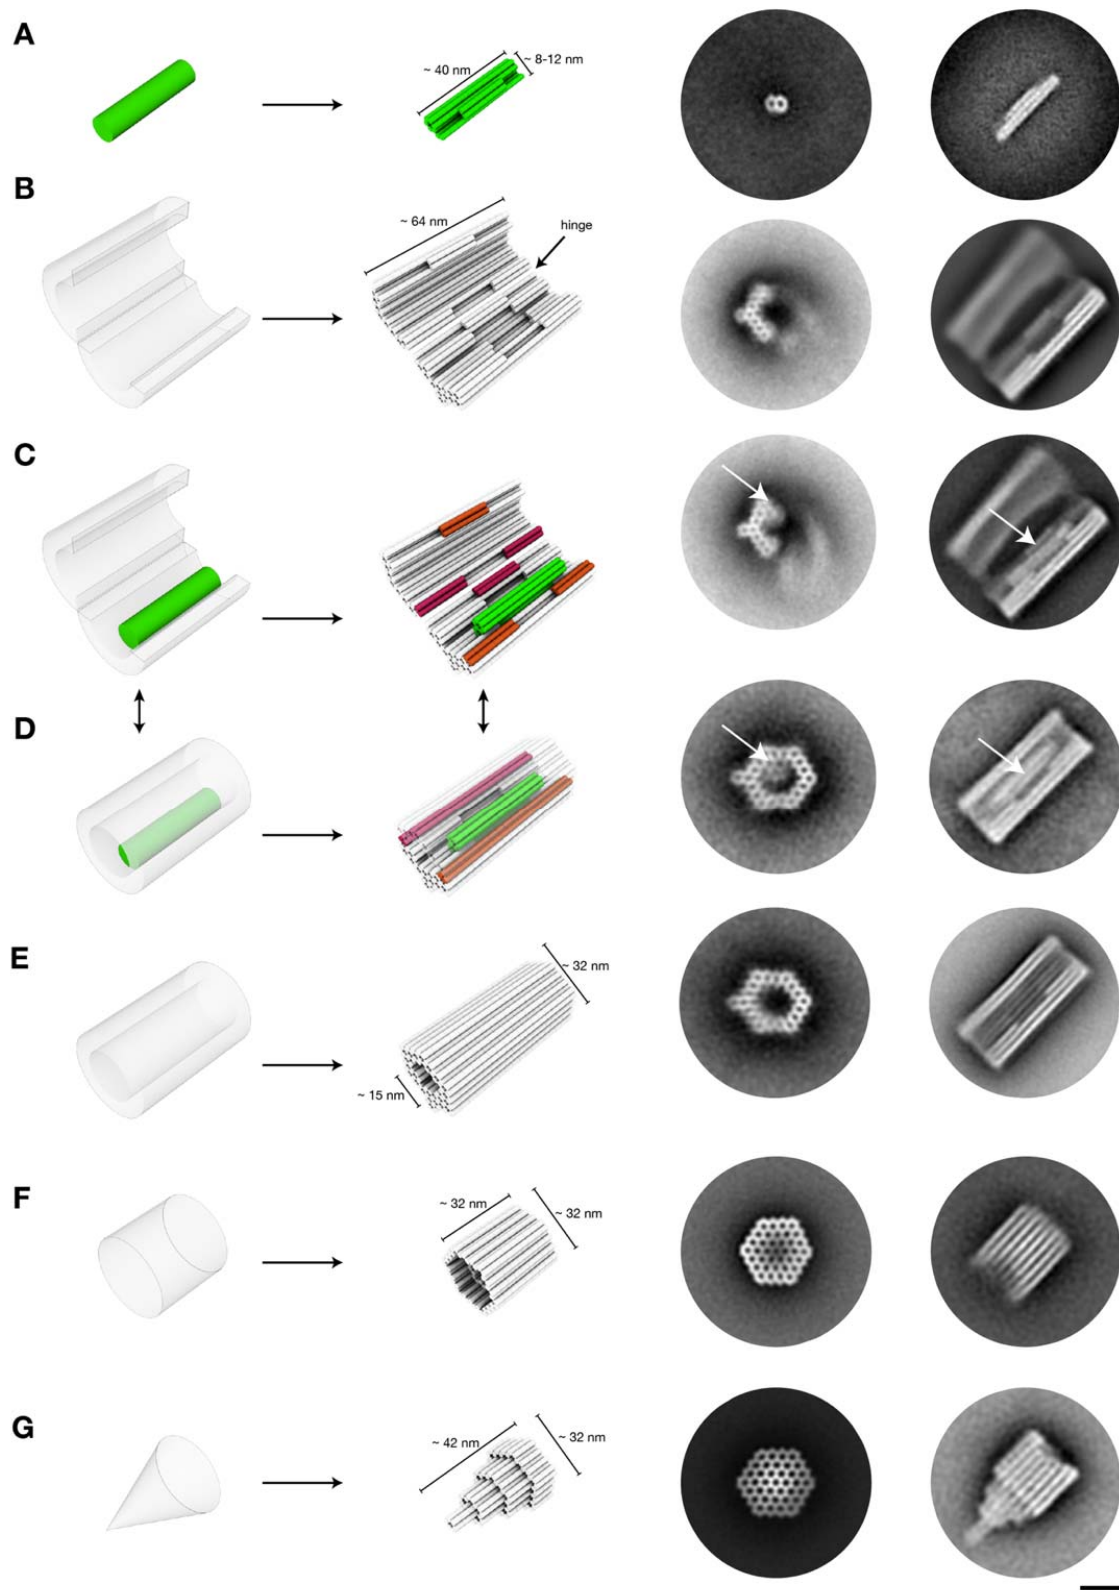

266

267 **Figure 2 | Construction of components with DNA origami. (A-G) Left:** Schematics of how target  
268 components are approximated as cylinder models. Cylinders represent DNA double-helices. **Right:**  
269 Representative 2D class average images from negative-staining TEM micrographs, with viewing angle along

270 the helical axis and perpendicular to the helical axis, respectively. Scale bar: 20 nm (C, D) Orange, magenta:

271 protrusions and recesses involved in closing the barrel.

272

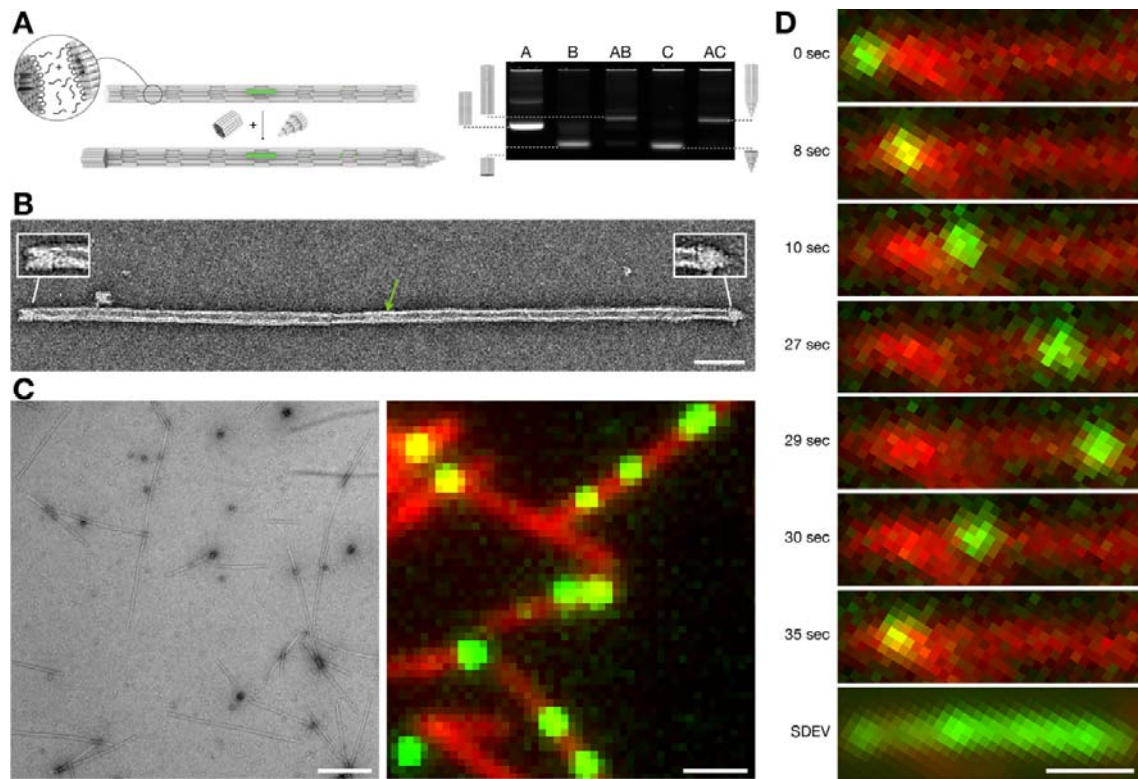

273

274 **Figure 3 | Filament polymerization, capping, and single particle imaging (A) Left:** Schematic illustration of  
275 the polymerization reaction and subsequent capping of the filament ends. Filament polymerization is induced  
276 by addition of DNA oligonucleotides that bridge barrel monomer helical interfaces. Subsequently, capping  
277 objects are added to solution which feature single-stranded DNA overhangs complementary to barrel ends.  
278 Cap attachment quenches further polymerization. The piston (green object inside the filament) is now  
279 sterically trapped. **Right:** Laser-scanned image of an agarose gel (2%, 21 mM MgCl<sub>2</sub>, 90 V, 90 min, ice-water  
280 bath) on which the following samples were electrophoresed: A=closed barrel, B=capping object, AB = closed  
281 barrel-capping object 1 dimers, C=closed barrel-capping object 1 dimers, C=capping object 2, AC=closed  
282 barrel-capping object 2 dimers. **(B)** Exemplary negative-staining TEM image of a capped filament. Green  
283 arrow: piston. Insets highlight cap monomers. Scale bar: 100 nm. **(C) Left:** Typical field of view negatively  
284 stained TEM image of polymerized filaments. **Right:** Typical field of view TIRF image of polymerized  
285 filaments with piston object trapped inside. The filaments are labeled with Cyanine-5 dyes, the piston carries  
286 8 Cyanine-3 dyes, image is merged from the two fluorescence channels. Scale bars: 1  $\mu$ m. **(D)** Exemplary  
287 sequence of single frames taken from a TIRF movie reflecting movement of a piston along a filament.  
288 **Bottom:** Standard deviation from the mean image for the entire movie (6000 frames, frame rate=10/sec),  
289 illustrating that the piston has travelled across the entire length of this  $\sim$ 3  $\mu$ m long filament. Scale bar: 1  $\mu$ m.

290

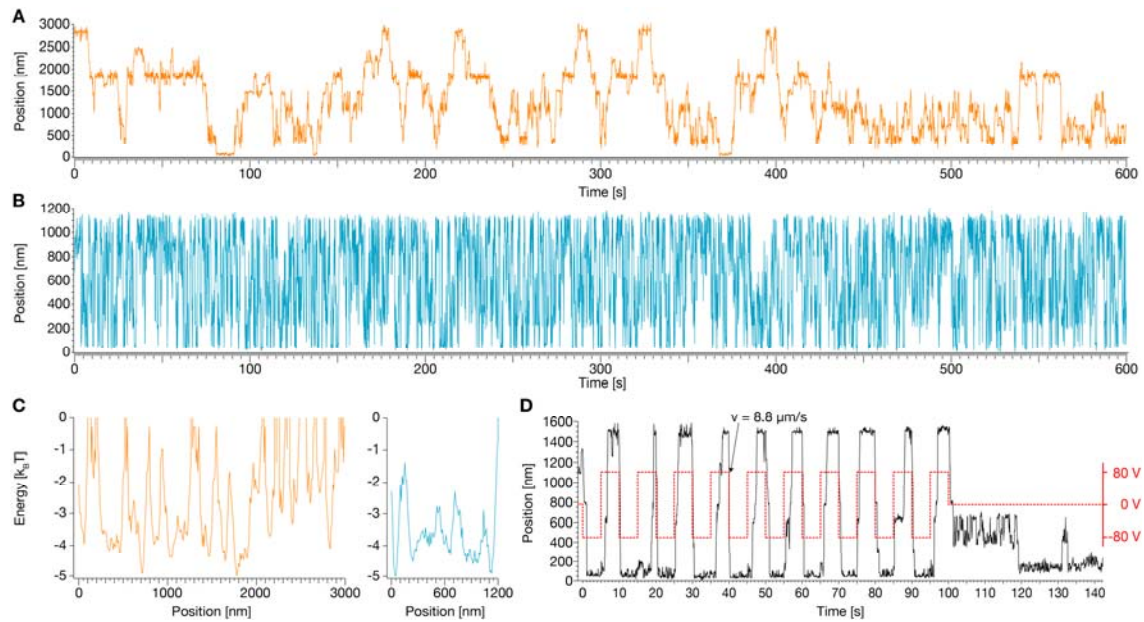

291

292 **Figure 4 | Exemplary single-particle position-time traces for motion along filaments (A, B)** Exemplary  
293 single particle traces, along the farthest measured distance (3  $\mu\text{m}$ ) and with the highest measured mobility,  
294 respectively. **(C)** Energy profiles computed from position probability distributions for the traces in A, B. **(D)**  
295 Red dashed line: externally applied voltage that creates an electric field along a filament. Solid line:  
296 exemplary single particle trace of a field-driven piston.

297

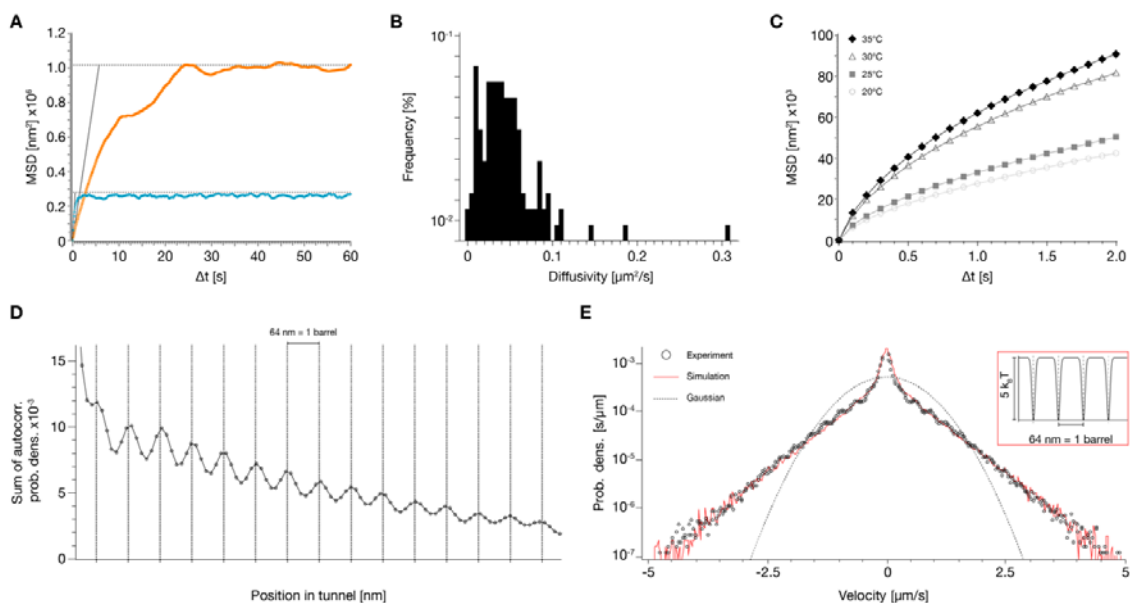

298

299 **Figure 5 | MSD, track periodicity, velocity distribution.** (A) Mean square displacement (MSD) curves of the  
300 single particle traces in Fig. 4 A, B, respectively. (B) Histogram of the diffusivities  $D$  of  $N=128$  particles. (C)  
301 Symbols: MSD as a function of time for single particle motion, recorded at the indicated temperatures.  $N=30$   
302 per condition. (D) Sum of the spatial autocorrelation computed for  $N=128$  particles. (E) Circles: velocity  
303 distributions computed from the time-derivative of single particle position-time traces. Dotted line: Gaussian  
304 distribution. Red solid line: velocity distribution simulated using Langevin dynamics. Inset: free energy surface  
305 used in the simulation.

306

307 REFERENCES

- 308 1. N. Hirokawa, Kinesin and dynein superfamily proteins and the mechanism of organelle transport.  
309 *Science* **279**, 519-526 (1998).
- 310 2. S. M. Block, Kinesin motor mechanics: binding, stepping, tracking, gating, and limping. *Biophys J* **92**,  
311 2986-2995 (2007).
- 312 3. W. Qiu *et al.*, Dynein achieves processive motion using both stochastic and coordinated stepping.  
313 *Nat Struct Mol Biol* **19**, 193-200 (2012).
- 314 4. J. Helenius, G. Brouhard, Y. Kalaidzidis, S. Diez, J. Howard, The depolymerizing kinesin MCAK uses  
315 lattice diffusion to rapidly target microtubule ends. *Nature* **441**, 115-119 (2006).
- 316 5. I. Bruck, M. O'Donnell, The ring-type polymerase sliding clamp family. *Genome Biology* **2**, (2001).
- 317 6. K. Wallden, A. Rivera-Calzada, G. Waksman, Type IV secretion systems: versatility and diversity in  
318 function. *Cell Microbiol* **12**, 1203-1212 (2010).
- 319 7. G. P. Dubey, S. Ben-Yehuda, Intercellular nanotubes mediate bacterial communication. *Cell* **144**,  
320 590-600 (2011).
- 321 8. A. E. Vincent, D. M. Turnbull, V. Eisner, G. Hajnóczky, M. Picard, Mitochondrial Nanotunnels. *Trends*  
322 *Cell Biol* **27**, 787-799 (2017).
- 323 9. A. Rustom, R. Saffrich, I. Markovic, P. Walther, H. H. Gerdes, Nanotubular highways for intercellular  
324 organelle transport. *Science* **303**, 1007-1010 (2004).
- 325 10. B. Yurke, A. J. Turberfield, A. P. Mills, Jr., F. C. Simmel, J. L. Neumann, A DNA-fuelled molecular  
326 machine made of DNA. *Nature* **406**, 605-608 (2000).
- 327 11. J. Bath, A. J. Turberfield, DNA nanomachines. *Nature nanotechnology* **2**, 275-284 (2007).
- 328 12. H. Ramezani, H. Dietz, Building machines with DNA molecules. *Nat Rev Genet* **21**, 5-26 (2020).
- 329 13. A. E. Marras, L. Zhou, H. J. Su, C. E. Castro, Programmable motion of DNA origami mechanisms.  
330 *Proceedings of the National Academy of Sciences of the United States of America* **112**, 713-718 (2015).
- 331 14. P. Ketterer, E. M. Willner, H. Dietz, Nanoscale rotary apparatus formed from tight-fitting 3D DNA  
332 components. *Sci Adv* **2**, e1501209 (2016).
- 333 15. J. List, E. Falgenhauer, E. Kopperger, G. Pardatscher, F. C. Simmel, Long-range movement of large  
334 mechanically interlocked DNA nanostructures. *Nat Commun* **7**, 12414 (2016).
- 335 16. D. Y. Zhang, E. Winfree, Control of DNA strand displacement kinetics using toehold exchange.  
336 *Journal of the American Chemical Society* **131**, 17303-17314 (2009).
- 337 17. J. Pan, F. Li, T. G. Cha, H. Chen, J. H. Choi, Recent progress on DNA based walkers. *Curr Opin*  
338 *Biotechnol* **34**, 56-64 (2015).
- 339 18. A. J. Thubagere *et al.*, A cargo-sorting DNA robot. *Science* **357**, (2017).
- 340 19. H. Gu, J. Chao, S. J. Xiao, N. C. Seeman, A proximity-based programmable DNA nanoscale assembly  
341 line. *Nature* **465**, 202-205 (2010).
- 342 20. T. E. Tomov *et al.*, DNA Bipedal Motor Achieves a Large Number of Steps Due to Operation Using  
343 Microfluidics-Based Interface. *ACS nano* **11**, 4002-4008 (2017).
- 344 21. J. Valero, N. Pal, S. Dhakal, N. G. Walter, M. Famulok, A bio-hybrid DNA rotor-stator nanoengine  
345 that moves along predefined tracks. *Nat Nanotechnol* **13**, 496-503 (2018).
- 346 22. A. Bazrafshan *et al.*, Tunable DNA Origami Motors Translocate Ballistically Over  $\mu$  m Distances at  
347 nm/s Speeds. *Angew Chem Int Ed Engl* **59**, 9514-9521 (2020).
- 348 23. J. Li *et al.*, Exploring the speed limit of toehold exchange with a cartwheeling DNA acrobat. *Nat*  
349 *Nanotechnol* **13**, 723-729 (2018).
- 350 24. S. M. Douglas *et al.*, Self-assembly of DNA into nanoscale three-dimensional shapes. *Nature* **459**,  
351 414-418 (2009).
- 352 25. T. Gerling, K. F. Wagenbauer, A. M. Neuner, H. Dietz, Dynamic DNA devices and assemblies formed  
353 by shape-complementary, non-base pairing 3D components. *Science* **347**, 1446-1452 (2015).
- 354 26. F. A. S. Engelhardt *et al.*, Custom-Size, Functional, and Durable DNA Origami with Design-Specific  
355 Scaffolds. *Acs Nano* **13**, 5015-5027 (2019).
- 356 27. A. Yildiz, M. Tomishige, R. D. Vale, P. R. Selvin, Kinesin walks hand-over-hand. *Science* **303**, 676-678  
357 (2004).
- 358 28. E. Kopperger *et al.*, A self-assembled nanoscale robotic arm controlled by electric fields. *Science* **359**,  
359 296-301 (2018).
- 360 29. B. G. Mitterwallner, C. Schreiber, J. O. Daldrop, J. O. Rädler, R. R. Netz, Non-Markovian data-driven  
361 modeling of single-cell motility. *Phys Rev E* **101**, 032408 (2020).

- 362 30. N. Le Poul, B. Colasson, Electrochemically and Chemically Induced Redox Processes in Molecular  
363 Machines. *ChemElectroChem* **2**, 475-496 (2015).
- 364 31. R. D. Astumian, Optical vs. chemical driving for molecular machines. *Faraday Discussions* **195**, 583-  
365 597 (2016).
- 366 32. J.-P. Sauvage, From Chemical Topology to Molecular Machines (Nobel Lecture). *Angewandte Chemie*  
367 *International Edition* **56**, 11080-11093 (2017).
- 368 33. J. F. Stoddart, Mechanically Interlocked Molecules (MIMs)—Molecular Shuttles, Switches, and  
369 Machines (Nobel Lecture). *Angewandte Chemie International Edition* **56**, 11094-11125 (2017).
- 370 34. C. Cheng, J. F. Stoddart, Wholly Synthetic Molecular Machines. *ChemPhysChem* **17**, 1780-1793 (2016).
- 371 35. E. R. Kay, D. A. Leigh, Rise of the Molecular Machines. *Angewandte Chemie* **54**, 10080-10088 (2015).
- 372 36. S. Kassem *et al.*, Artificial molecular motors. *Chem Soc Rev* **46**, 2592-2621 (2017).
- 373 37. A. Coskun, M. Banaszak, R. D. Astumian, J. F. Stoddart, B. A. Grzybowski, Great expectations: can  
374 artificial molecular machines deliver on their promise? *Chemical Society Reviews* **41**, 19-30 (2012).
- 375 38. C. Pezzato, C. Cheng, J. F. Stoddart, R. D. Astumian, Mastering the non-equilibrium assembly and  
376 operation of molecular machines. *Chemical Society Reviews* **46**, 5491-5507 (2017).
- 377 39. R. D. Astumian, Trajectory and Cycle-Based Thermodynamics and Kinetics of Molecular Machines:  
378 The Importance of Microscopic Reversibility. *Accounts of Chemical Research* **51**, 2653-2661 (2018).
- 379 40. I. Goychuk, Molecular machines operating on the nanoscale: from classical to quantum. *Beilstein J*  
380 *Nanotechnol* **7**, 328-350 (2016).
- 381 41. P. Reimann, Brownian motors: noisy transport far from equilibrium. *Physics Reports* **361**, 57-265  
382 (2002).
- 383 42. R. D. Astumian, S. Mukherjee, A. Warshel, The Physics and Physical Chemistry of Molecular  
384 Machines. *ChemPhysChem* **17**, 1719-1741 (2016).
- 385 43. H. Ijas, I. Hakaste, B. Shen, M. A. Kostianen, V. Linko, Reconfigurable DNA Origami Nanocapsule for  
386 pH-Controlled Encapsulation and Display of Cargo. *ACS nano* **13**, 5959-5967 (2019).
- 387 44. A. Idili, F. Ricci, Design and Characterization of pH-Triggered DNA Nanoswitches and Nanodevices  
388 Based on DNA Triplex Structures. *Methods in molecular biology* **1811**, 79-100 (2018).
- 389 45. J. M. Majikes, L. C. C. Ferraz, T. H. LaBean, pH-Driven Actuation of DNA Origami via Parallel I-Motif  
390 Sequences in Solution and on Surfaces. *Bioconjug Chem* **28**, 1821-1825 (2017).
- 391 46. A. M. Maier *et al.*, Magnetic Propulsion of Microswimmers with DNA-Based Flagellar Bundles. *Nano*  
392 *Lett* **16**, 906-910 (2016).
- 393 47. A. Kuzyk *et al.*, A light-driven three-dimensional plasmonic nanosystem that translates molecular  
394 motion into reversible chiroptical function. *Nat Commun* **7**, 10591 (2016).
- 395 48. Y. Yang *et al.*, A Photoregulated DNA-Based Rotary System and Direct Observation of Its Rotational  
396 Movement. *Chemistry* **23**, 3979-3985 (2017).
- 397 49. A. Gopinath, E. Miyazono, A. Faraon, P. W. Rothemund, Engineering and mapping nanocavity  
398 emission via precision placement of DNA origami. *Nature* **535**, 401-405 (2016).
- 399 50. A. M. Mohammed, P. Šulc, J. Zenk, R. Schulman, Self-assembling DNA nanotubes to connect  
400 molecular landmarks. *Nat Nanotechnol* **12**, 312-316 (2017).
- 401
